# Supplementary material for: Identification of a novel cell culture adaptation site on the capsid of foot-and-mouth disease virus
Source: PubMed Central journal article supplement (PMC4635497; doi:10.1099/jgv.0.000222), 2015-09
Supplement: vir-96-09-2684-s001.pdf [file vir-96-09-2684-s001.pdf]

**VP2**

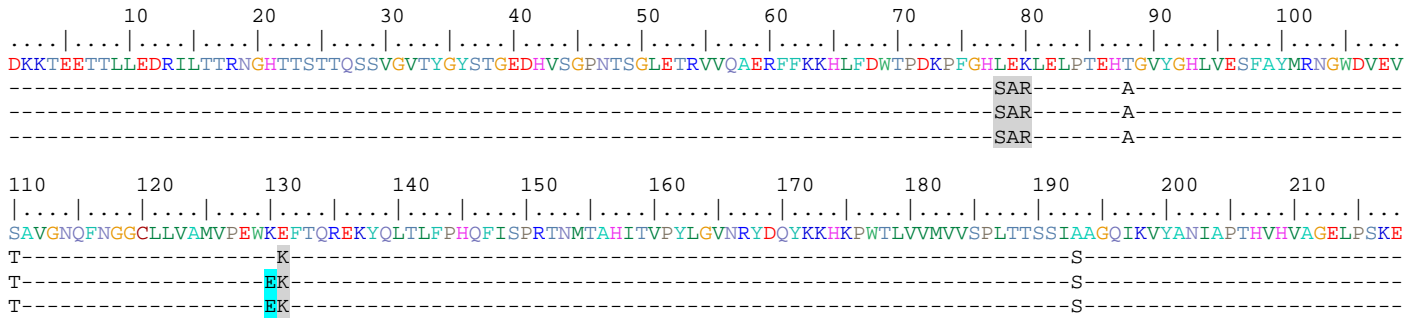

**VP3**

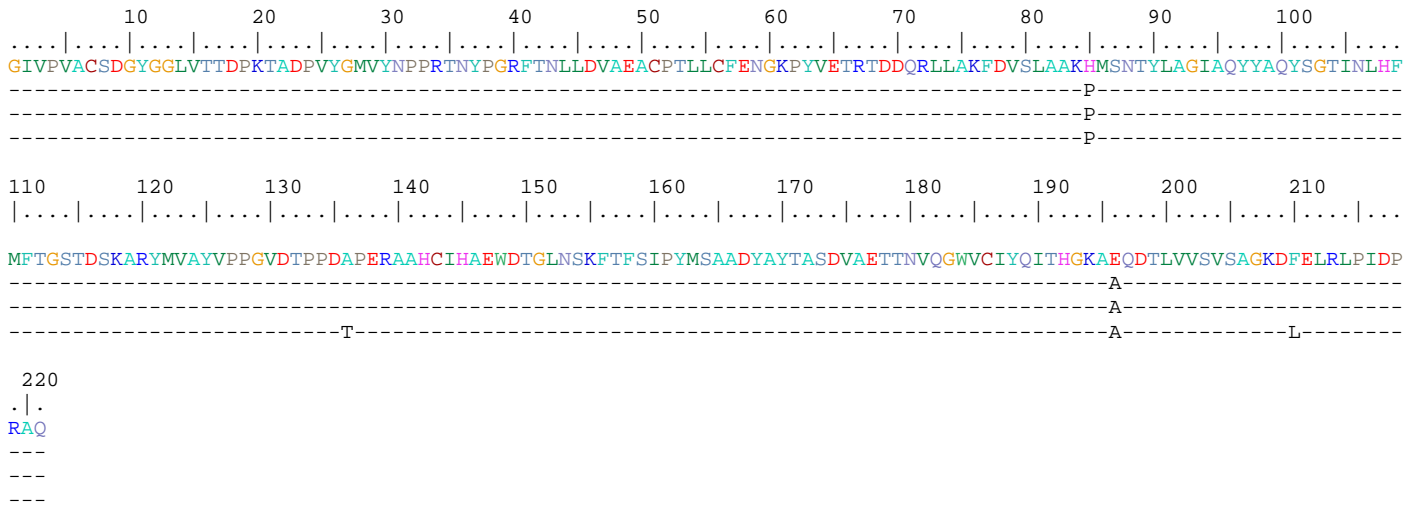

**VP1**

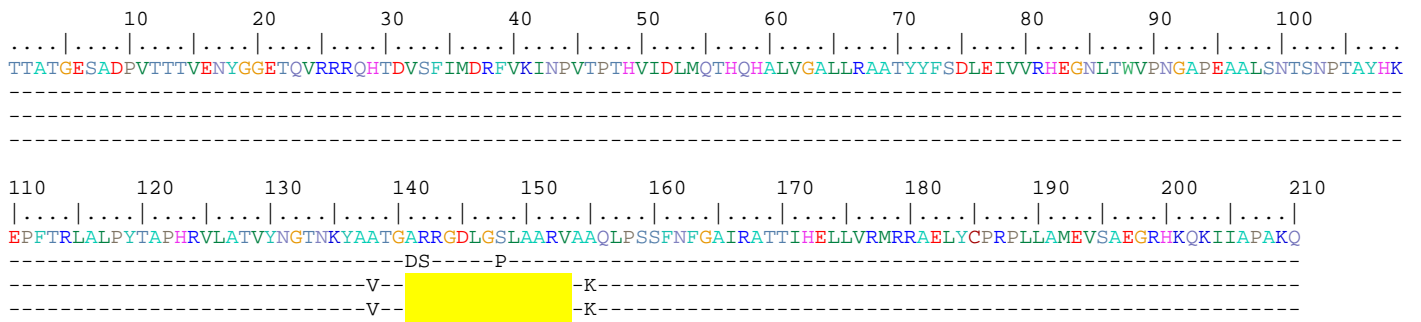

**Fig. S1. Capsid amino-acid sequence alignment**

Shown is the amino acid sequence of VP2, VP3 and VP1. Upper sequence, the A/IRN/2/87 field isolate; Second sequence, the A+ virus; Third sequence, the consensus sequence of the A- virus; Lower sequence, v01K/A-. A dash indicates identity with the field isolate. The region of VP1 G-H loop deleted in the A- virus and v01K/A- are highlighted by the yellow bar. VP2 residues (78-80 and 131) are indicated by grey highlights. The K to E changes at VP2 130 seen in the A- virus and v01K/A- are indicated by blue highlights. The T and L at VP3 136 and 210 respectively were only present in v01K/A-. All other changes were at residues that are either buried within VP3 (VP3 85) or at the inter-pentamer interface (VP2: 88, 110, 193 and VP3 196) where they are unlikely to directly influence receptor specificity.

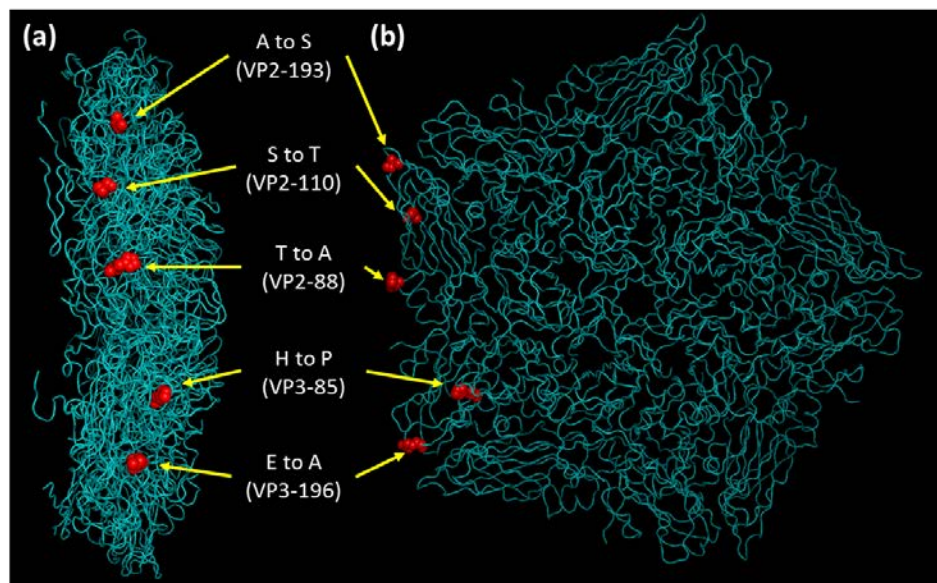

**Fig. S2.** Selected residues where the amino acids of the A/IRN/2/87 field isolate are different to the A+ and A- viruses. Residue positions are shown mapped onto the crystal structure of a pentamer of a related FMDV A<sub>10</sub>61. In the virion, these residues are either located at the interface between adjacent pentamers (VP2 88, 110, 193 and VP3 196) or buried within VP3 (VP3-85). Panel (a) shows a side elevation and panel (b) a view of the outer capsid surface. Amino acids are given by the single letter code.

| <b>Table S1. List of mutagenesis primer sequences</b>                                    |                                         |                          |           |
|------------------------------------------------------------------------------------------|-----------------------------------------|--------------------------|-----------|
| <b>vO1K/A-</b>                                                                           | <b>Sequence 5'-3'</b>                   | <b>Site and mutation</b> |           |
| F                                                                                        | AAGCCGTTTGGGCACGCAGCAGCGTTGGAAC TCCCACC | VP2 78-80                | SAR → AAA |
| R                                                                                        | GGTGGGGAGTTCCAACGCTGCTGCGTGCCCAAACGGCTT |                          |           |
| F                                                                                        | AAGCCGTTTGGGCACTCAGCAGCGTTGGAAC TCCCACC |                          | SAR → SAA |
| R                                                                                        | GGTGGGGAGTTCCAACGCTGCTGAGTGCCCAAACGGCTT |                          |           |
| F                                                                                        | AAGCCGTTTGGGCACGCAGCAAGATTGGAAC TCCCACC |                          | SAR → AAR |
| R                                                                                        | GGTGGGGAGTTCCAATCTTGCTGCGTGCCCAAACGGCTT |                          |           |
| F                                                                                        | GCCATGGTTCTCTGAATGGGCAGCATTACTCAGCGCGAG | VP2 130-131              | EK → AA   |
| R                                                                                        | CTCGCGCTGAGTGAATGCTGCCATT CAGGAACCATGGC |                          |           |
| F                                                                                        | GCCATGGTTCTCTGAATGGAAAGAGTTACTCAGCGCGAG |                          | EK → KE   |
| R                                                                                        | CTCGCGCTGAGTGAAC TTTCCATT CAGGAACCATGGC |                          |           |
| <b>vO1k/A/TUR</b>                                                                        |                                         |                          |           |
| F                                                                                        | GGTAATGGCAGAAAAGGTGCGCTGGGGCCTC         | VP1 143-145              | RGD → KGA |
| R                                                                                        | GAGGCC-CAGCGCACCTTTTCTGCCATTACC         |                          |           |
| F                                                                                        | GCCTACCACAAGGCACCATTACGAGACTTGCG        | VP1 110                  | Q → A     |
| R                                                                                        | CGCAAGTCTCGTAAATGGTGCCTTGTTGGTAGGC      |                          |           |
| F                                                                                        | GCTTTTGGACTCGGCAAGGCTGGAAC TCCC         | VP2 78-80                | LEK → SAR |
| R                                                                                        | GGGGAGTTCCAGCCTTGCCGAGTG TCCAAAAGC      |                          |           |
| F                                                                                        | GCCATGGTACCTGAGTGGGAGAAATTTACCCCTCGTGAG | VP2 130-131              | KE → EK   |
| R                                                                                        | CTCACGAGGGGTAAATTTCTCCCACTCAGGTACCATGGC |                          |           |
| F                                                                                        | GCCATGGTACCTGAGTGGAAAAAATTTACCCCTCGTGAG |                          | KE → KK   |
| R                                                                                        | CTCACGAGGGGTAAATTTTTCCTACTCAGGTACCATGGC |                          |           |
| F: Forward primer; R: Reverse primer; Amino acids are shown using the single letter code |                                         |                          |           |
